# Supplementary material
Source: PubMed Central journal article supplement (PMC3369825)
Supplement: NIHMS381212-supplement-suppl_data.pdf [file NIHMS381212-supplement-suppl_data.pdf]

## Supplemental Data

# $\alpha$ -Catenin Is a Molecular Switch that Binds E-Cadherin- $\beta$ -Catenin and Regulates Actin-Filament Assembly

Frauke Drees, Sabine Pokutta, Soichiro Yamada, W. James Nelson, and William I. Weis

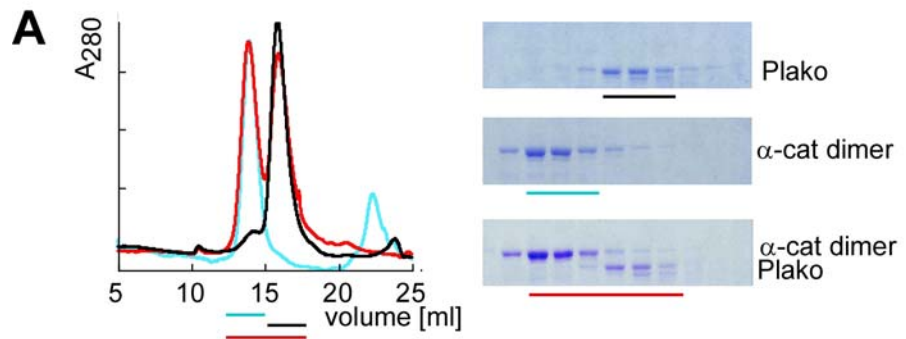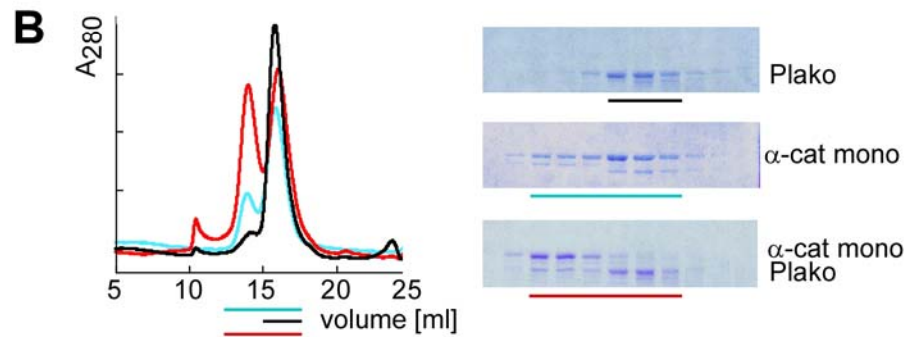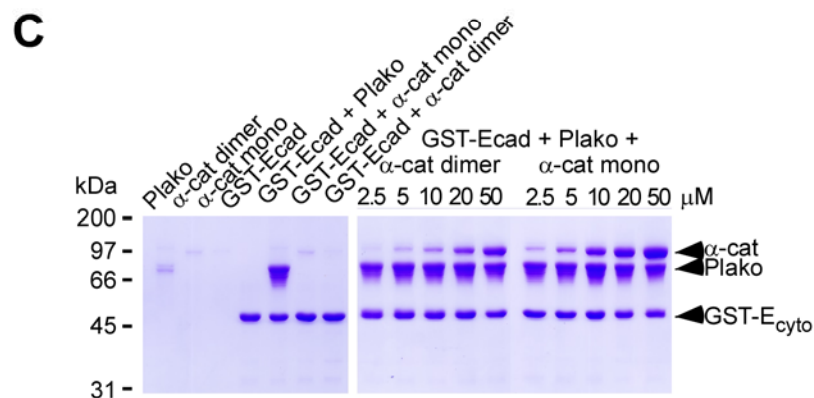

### **Figure S1. Plakoglobin and Actin Binding Activity of $\alpha$ -Catenin**

(A) Superdex 200 gel filtration chromatography of the  $\alpha$ -catenin dimer and plakoglobin incubated overnight (red line) and of the individual proteins,  $\alpha$ -catenin dimer (blue) and plakoglobin (black). Fractions analyzed by SDS PAGE are shown for the individual runs on the right. Peak fractions are indicated by colored bars.

(B) Gel filtration chromatography as described in (A) with the  $\alpha$ -catenin monomer.

(C) GST-E-cadherin cytoplasmic domain (10  $\mu$ M) and plakoglobin (10  $\mu$ M) were incubated with  $\alpha$ -catenin monomer or dimer at the indicated concentrations. Protein complexes were isolated on GST-agarose beads and analyzed by SDS PAGE.
